# Supplementary material for: Hon-yaku: a biology-driven Bayesian methodology for identifying translation initiation sites in prokaryotes
Source: Springer Nature journal article supplement (doi:10.1186/1471-2105-8-47), 2007-02-08

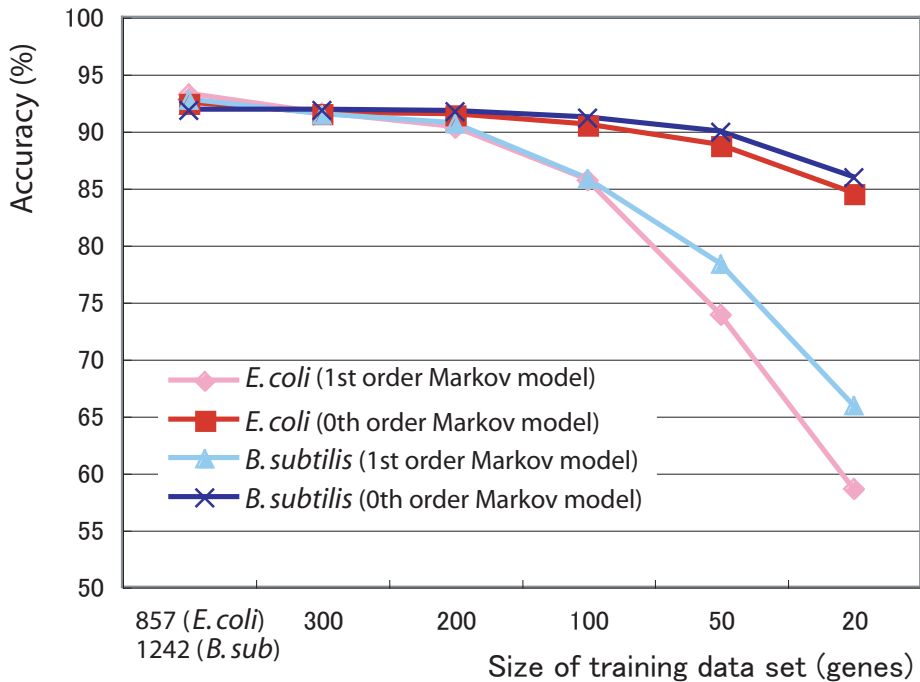

Supplement: 12859_2006_1419_MOESM1_ESM.pdf [file 12859_2006_1419_MOESM1_ESM.pdf]
